# Supplementary figures and images for: Diagnosis, prevention and treatment of common lower extremity muscle injuries in sport – grading the evidence: a statement paper commissioned by the Danish Society of Sports Physical Therapy (DSSF)
Source: HighWire-hosted journal article supplement (doi:10.1136/bjsports-2019-101228), 2020-01-14

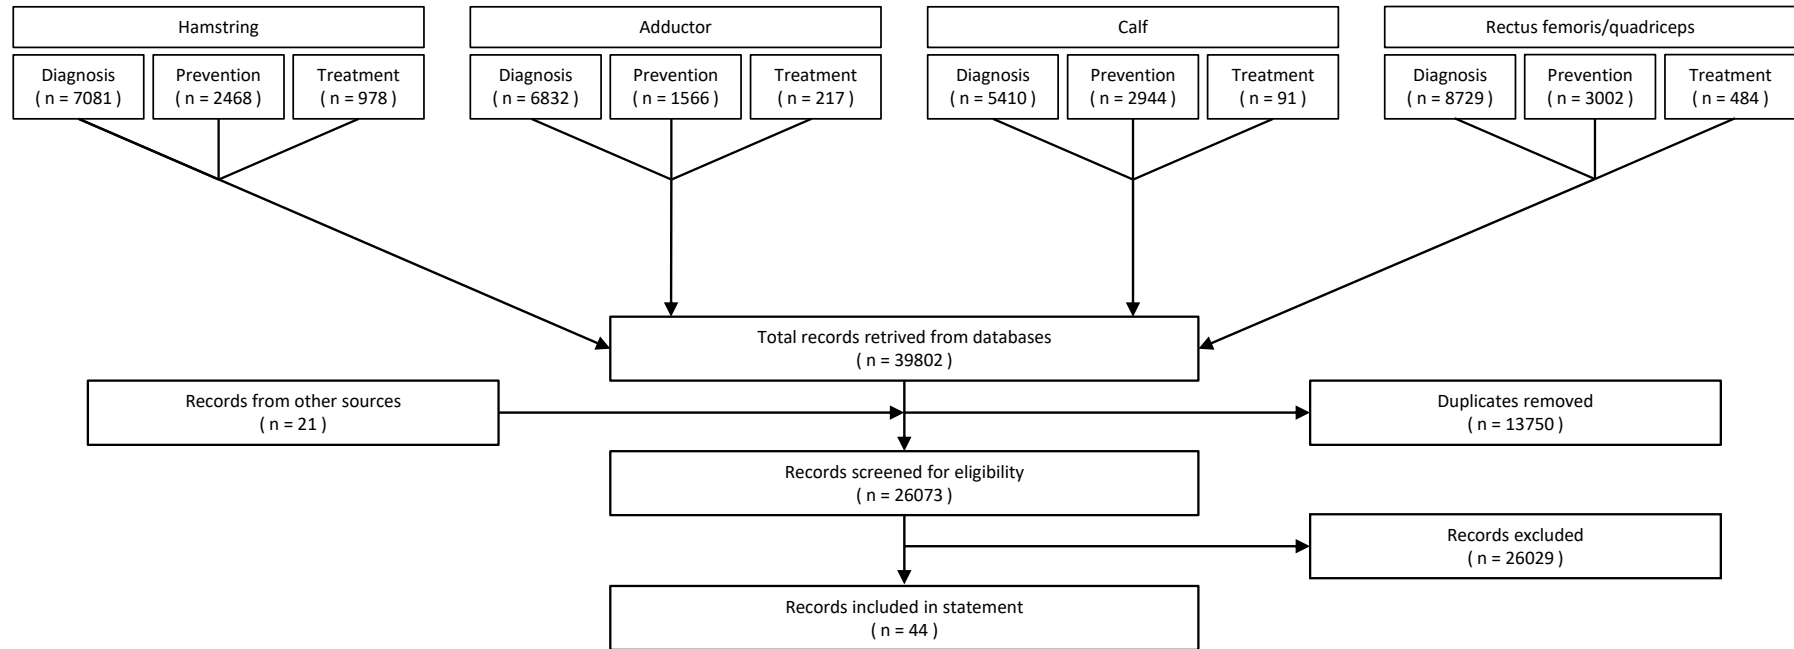

Supplement: bjsports-2019-101228supp001_data_supplement.pdf [file bjsports-2019-101228supp001_data_supplement.pdf]
